# Supplementary material for: Quantification of particulate Ag in rainbow trout organs following dietary exposure to silver nitrate, or two forms of engineered silver nanoparticles
Source: Royal Society of Chemistry journal article supplement (doi:10.1039/d1en00188d), 2021-01-01
Supplement: d1en00188d1.pdf [file d1en00188d1.pdf]

### **Supplementary Information**

Quantification of particulate Ag in rainbow trout organs following dietary exposure to silver nitrate, or two forms of engineered silver nanoparticles

Nathaniel J. Clark<sup>1</sup>, Robert Clough<sup>2</sup>, David Boyle<sup>1</sup> and Richard D. Handy<sup>1</sup>

<sup>1</sup>School of Biological and Marine Sciences, University of Plymouth, Plymouth, United Kingdom.

<sup>2</sup>Analytical Research Facility, School of Geography, Earth and Environmental Sciences, University of Plymouth, Plymouth, United Kingdom.

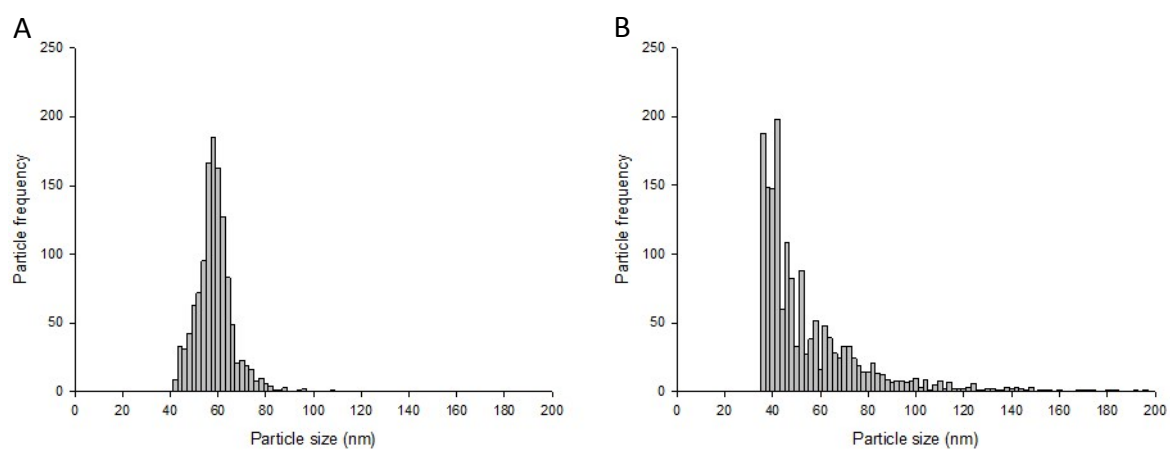

Figure S1. Example size distribution of (A) Ag NPs and (B) Ag<sub>2</sub>S NPs in deionised ultrapure water that were subsequently added to the fish diet.

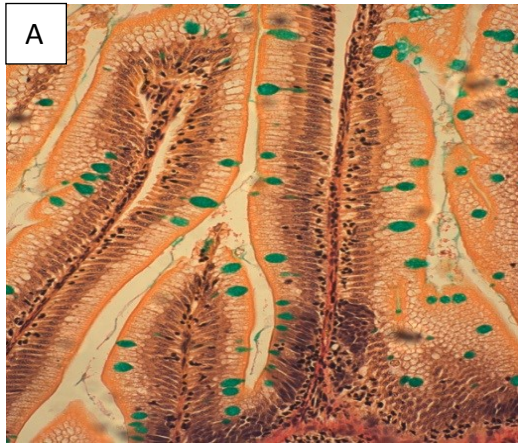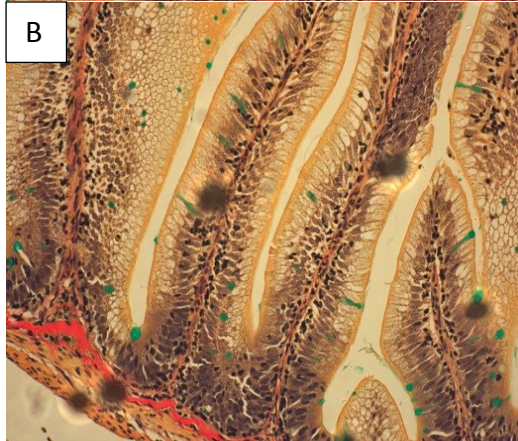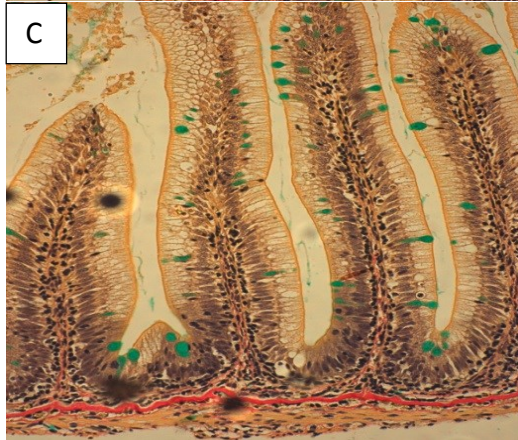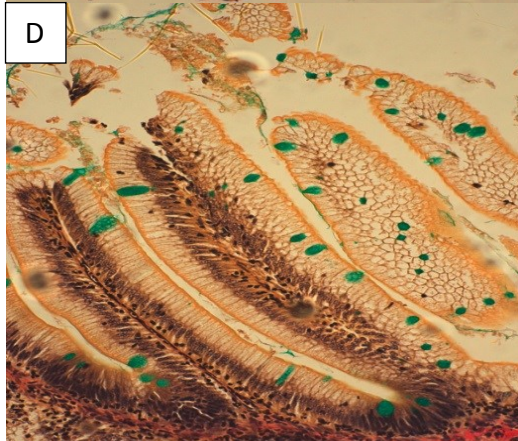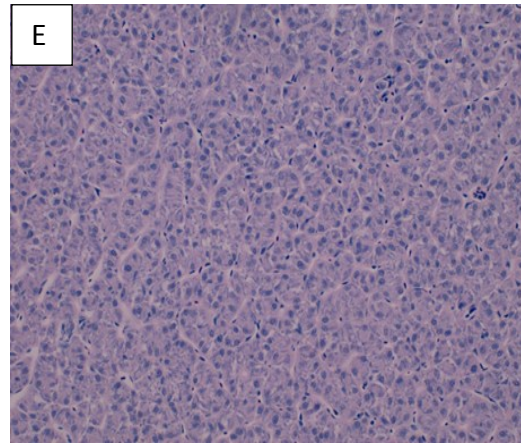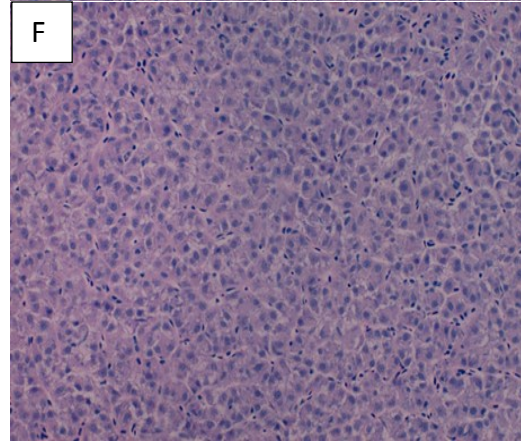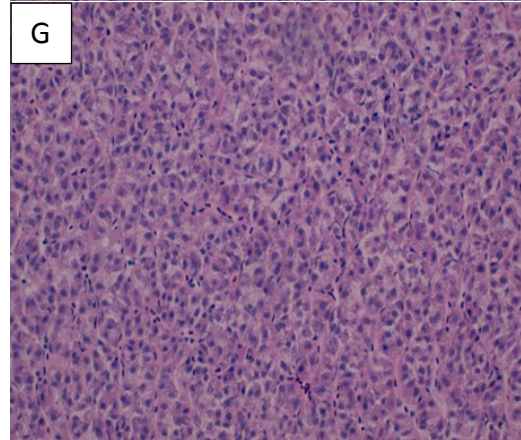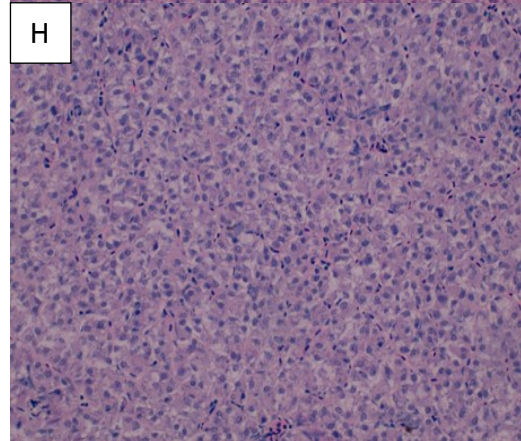

Figure S2. Histological sections of the hind intestine (left) and liver (right) following 4 weeks exposure to control (no added Ag; A, E), or 100 mg/kg of Ag as AgNO<sub>3</sub> (B, F), Ag NPs (C, G) or Ag<sub>2</sub>S NPs (D and H). The intestines were stained using haematoxylin/ alcian blue/ van Gieson to highlight collagen (red), mucins (blue/turquoise), muscle and red blood cells (yellow), cytoplasm (pink/yellow) and nuclei (black/brown). The liver was stained with Haematoxylin and Eosin. Note: there was no evidence of pathology in the hind intestine or the liver.

Table S1. The speciation of 0.93 mmol L<sup>-1</sup> dissolved silver as percentage (%) of total Ag speciation under different physiological compartments at different concentrations.

| Compartment                       | Percent species (%) |
|-----------------------------------|---------------------|
| Stomach pH 2                      |                     |
| Ag <sup>+</sup>                   | 0.045               |
| AgCl (aq)                         | 6.725               |
| AgCl <sub>2</sub> <sup>-</sup>    | 74.719              |
| AgCl <sub>3</sub> <sup>-2</sup>   | 18.512              |
| Upper GIT pH 7.8                  |                     |
| Ag <sup>+</sup>                   | 0.044               |
| AgCl (aq)                         | 6.741               |
| AgCl <sub>2</sub> <sup>-</sup>    | 74.769              |
| AgCl <sub>3</sub> <sup>-2</sup>   | 18.444              |
| Lower GIT pH 9                    |                     |
| Ag <sup>+</sup>                   | 0.044               |
| AgCl (aq)                         | 6.741               |
| AgCl <sub>2</sub> <sup>-</sup>    | 74.769              |
| AgCl <sub>3</sub> <sup>-2</sup>   | 18.445              |
| Blood compartment pH 7.8          |                     |
| Ag <sup>+</sup>                   | 0.039               |
| AgCl (aq)                         | 6.528               |
| AgCl <sub>2</sub> <sup>-</sup>    | 74.887              |
| AgCl <sub>3</sub> <sup>-2</sup>   | 18.546              |
| Intracellular compartments pH 7.4 |                     |
| Ag <sup>+</sup>                   | 0.032               |
| AgCl (aq)                         | 5.865               |
| AgCl <sub>2</sub> <sup>-</sup>    | 73.860              |
| AgCl <sub>3</sub> <sup>-2</sup>   | 20.242              |

The GIT saline components were (in mmol L<sup>-1</sup>) NaCl (117.5), KCl, (5.7), CaCl<sub>2</sub>, (2.5) and MgSO<sub>4</sub> (1.2; Clark et al. 2019), with the only change between calculations the pH. The blood compartment saline components were (in mmol L<sup>-1</sup>) NaCl (121.4), KCl (5.1), CaCl<sub>2</sub> (1.4) and MgSO<sub>4</sub> (1.9) at pH 7.8 (Clark et al. 2019). The intracellular components were (in mmol L<sup>-1</sup>) KCl (140), Na (10), MgSO<sub>4</sub> (1) and CaCl<sub>2</sub> (0.1).
